# Supplementary material for: Combination of Alkaline and Heat Pretreatments with Zero-Valent Iron Application in Cassava Pulp and Wastewater for Methane Generation: Development from Batch to Continuous Systems
Source: MDPI journal article supplement (doi:10.3390/fermentation9020108), 2023-01-23
Supplement: s1 [file s1]

**Figure S1.** Characterization of synthesized ZVI and its comparison with results from literature.

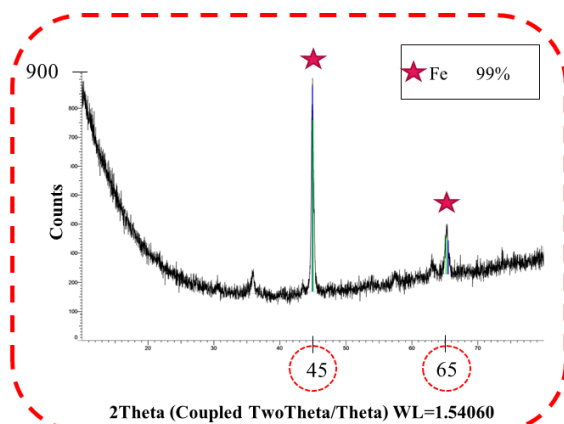

XRD diffractogram from current study

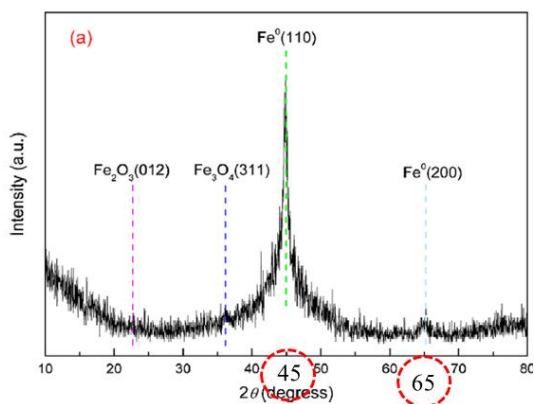

(Dongsheng et al., 2019)

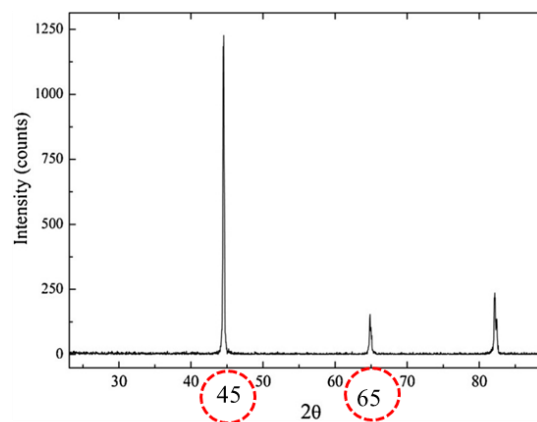

(Mossmann et al., 2019)

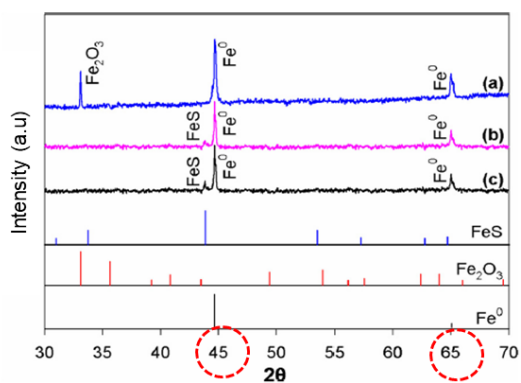

(Lü et al., 2019)

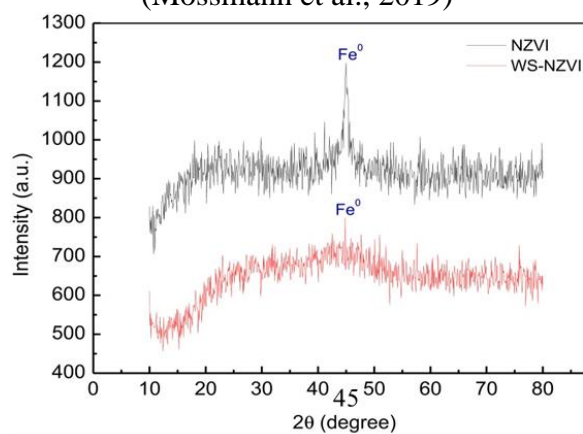

(Shao et al., 2018)

**Table S1.** Comparison of Heat and pH pretreatments effect on biogas production from several anaerobic digestion

| Reference                                | Hydrolysis process | pH   | Temp <sup>o</sup> (°C) | Heat treatment (min) | Iron forms  | ZVI (m)                 | Raw materials | Biogas <sup>3</sup> (m <sup>3</sup> /kg TVS) | CH <sub>4</sub> <sup>3</sup> (m <sup>3</sup> /kg TVS) |
|------------------------------------------|--------------------|------|------------------------|----------------------|-------------|-------------------------|---------------|----------------------------------------------|-------------------------------------------------------|
| This study                               | heat               | 5.45 | -                      | -                    | -           | -                       | Cassaa pulp   | 0.13                                         | 0.03                                                  |
| This study                               | heat               | 5.45 | 100                    | 30                   | Scarp       | 2-3x10 <sup>-3</sup>    | Cassaa pulp   | 0.28                                         | 0.09                                                  |
| This study                               | heat               | 8    | 100                    | 30                   | -           | -                       | Cassaa pulp   | 3.52                                         | 0.82                                                  |
| This study                               | heat               | 8    | 100                    | 30                   | Scarp       | 2-3x10 <sup>-3</sup>    | Cassaa pulp   | 6.02                                         | 2.39                                                  |
| This study                               | heat               | 9    | 100                    | 30                   | -           | -                       | Cassaa pulp   | 5.22                                         | 2.07                                                  |
| This study                               | heat               | 9    | 100                    | 30                   | Scarp       | 2-3x10 <sup>-3</sup>    | Cassaa pulp   | 7.22                                         | 3.68                                                  |
| This study                               | heat               | 10   | 100                    | 30                   | -           | -                       | Cassaa pulp   | 6.54                                         | 2.41                                                  |
| This study                               | heat               | 10   | 100                    | 30                   | Scarp       | 2-3x10 <sup>-3</sup>    | Cassaa pulp   | 9.96                                         | 5.35                                                  |
| This study                               | heat               | 11   | 100                    | 30                   | -           | -                       | Cassaa pulp   | 5.28                                         | 1.87                                                  |
| This study                               | heat               | 11   | 100                    | 30                   | Scarp       | 2-3x10 <sup>-3</sup>    | Cassaa pulp   | 7.40                                         | 3.27                                                  |
| Yangin-Gomec et al. (2018)               | -                  | -    | -                      | -                    | Iron Powder | 50x10 <sup>-9</sup>     | Excess sludge | -                                            | 0.09                                                  |
| (Yang et al., 2018)                      | -                  | -    | -                      | -                    | Iron Powder | 0.5-10x10 <sup>-6</sup> | Pig manure    | -                                            | 0.17                                                  |
| (Abdelsalam et al., 2017)                | -                  | -    | -                      | -                    | Iron Powder | 9±0.3x10 <sup>-9</sup>  | Pig manure    | -                                            | 0.35                                                  |
| (Hu et al., 2015)                        | -                  | -    | -                      | -                    | Iron Powder | 1x10 <sup>-9</sup>      | Excess sludge | -                                            | 0.56                                                  |
| (Feng et al., 2014)                      | -                  | -    | -                      | -                    | Iron Powder | 0.2x10 <sup>-3</sup>    | Excess Sludge | -                                            | 0.28                                                  |
| (Su et al., 2013)                        | -                  | -    | -                      | -                    | Iron Powder | 20x10 <sup>-9</sup>     | Excess sludge | -                                            | 0.02                                                  |
| Zhang et al., (2013)                     | Bacteria Cellulose | -    | -                      | -                    | -           | -                       | Excess sludge | -                                            | 0.13                                                  |
| (Sukwanitch, 2011)                       | heat               | 13   | 100                    | 90                   | -           | -                       | Excess sludge | -                                            | 1.21                                                  |
| (Gaewchingduang & Pengthemkeerati, 2010) | Heat               | <7   | 120                    | 60                   | -           | -                       | Excess sludge | -                                            | 0.25                                                  |
| (Zhang et al., 2011)                     | -                  | -    | -                      | -                    | Scarp       | 8×4×2 x10 <sup>-3</sup> | Excess sludge | -                                            | 1.51                                                  |

**Table S2.** Comparison of ZVI pretreatments effect on biogas production from several anaerobic digestion

| Reference                                | Iron concentration      | Substrate | Size ZVI (m)                         | Materials           | Biogas (m <sup>3</sup> /kg TVS) | CH <sub>4</sub> (m <sup>3</sup> /kg TVS) |
|------------------------------------------|-------------------------|-----------|--------------------------------------|---------------------|---------------------------------|------------------------------------------|
| This study                               | -                       | -         | -                                    | Cassava Pulp        | 3.50                            | 1.21                                     |
| This study                               | 0.92 g/l (40 g/kg TVS)  | Scarp     | $2-3 \times 10^{-3}$                 | Cassava Pulp        | 7.78                            | 2.39                                     |
| This study                               | 1.15 g/l (50 g/kg TVS)  | Scarp     | $2-3 \times 10^{-3}$                 | Cassava Pulp        | 8.94                            | 3.77                                     |
| This study                               | 1.38 g/l (60 g/kg TVS)  | Scarp     | $2-3 \times 10^{-3}$                 | Cassava Pulp        | 8.44                            | 2.72                                     |
| This study                               | 1.61 g/l (70 g/kg TVS)  | Scarp     | $2-3 \times 10^{-3}$                 | Cassava Pulp        | 7.76                            | 2.03                                     |
| This study                               | 1.84 g/l (80 g/kg TVS)  | Scarp     | $2-3 \times 10^{-3}$                 | Cassava Pulp        | 5.67                            | 1.59                                     |
| This study                               | 2.07 g/l (90 g/kg TVS)  | Scarp     | $2-3 \times 10^{-3}$                 | Cassava Pulp        | 6.99                            | 1.41                                     |
| This study                               | 2.30 g/l (100 g/kg TVS) | Scarp     | $2-3 \times 10^{-3}$                 | Cassava Pulp        | 7.35                            | 1.50                                     |
| (Yangin-Gomec et al., 2018)              | 1 g/l                   | Scarp     | $50 \times 10^{-9}$                  | Anaerobic community | -                               | 0.09                                     |
| (Yang et al., 2018)                      | 5 g/l                   | Scarp     | $0.5-10 \times 10^{-6}$              | Piggery wastewater  | -                               | 0.17                                     |
| (Abdelsalam et al., 2017)                | 20 mg/l                 | Scarp     | $9 \pm 0.3 \times 10^{-9}$           | Pig manure          | -                               | 0.35                                     |
| (Hu et al., 2015)                        | 5 g/l                   | Scarp     | $1 \times 10^{-9}$                   | Anaerobic sludge    | -                               | 0.56                                     |
| (Feng et al., 2014)                      | 20 g/l                  | Scarp     | $0.2 \times 10^{-3}$                 | Sludge from UASB    | -                               | 0.28                                     |
| (Su et al., 2013)                        | 10 g/l                  | Scarp     | $20 \times 10^{-9}$                  | Sludge              | -                               | 0.02                                     |
| (Zhang et al., 2011)                     | 10 g/l                  | Scarp     | $8 \times 4 \times 2 \times 10^{-3}$ | Sludge              | -                               | 1.51                                     |
| (Sukwanitch, 2011)                       | -                       | -         | -                                    | Cassava Pulp        | -                               | 1.21                                     |
| (Gaewchingduang & Pengthemkeerati, 2010) | -                       | -         | -                                    | Cassava Pulp        | -                               | 0.25                                     |

Abdelsalam, E., Samer, M., Attia, Y. A., Abdel-Hadi, M. A., Hassan, H. E., & Badr, Y. (2017). Influence of zero valent iron nanoparticles and magnetic iron oxide nanoparticles on biogas and methane production from anaerobic digestion of manure. *Energy*, 120, 842-853.  
<https://doi.org/https://doi.org/10.1016/j.energy.2016.11.137>

Dongsheng, Z., Wenqiang, G., Guozhang, C., Shuai, L., Weizhou, J., & Youzhi, L. (2019). Removal of heavy metal lead(II) using nanoscale zero-valent iron with different preservation methods. *Advanced Powder Technology*, 30(3), 581-589.  
<https://doi.org/https://doi.org/10.1016/j.appt.2018.12.013>

Feng, Y., Zhang, Y., Quan, X., & Chen, S. (2014). Enhanced anaerobic digestion of waste activated sludge digestion by the addition of zero valent iron. *Water Research*, 52, 242-250.  
<https://doi.org/https://doi.org/10.1016/j.watres.2013.10.072>

- Gaewchingduang, S., & Pengthemkeerati, P. (2010). Enhancing efficiency for reducing sugar from cassava bagasse by pretreatment. *International Journal of Environmental and Ecological Engineering*, 4(10), 477-480.
- Hu, Y., Hao, X., Zhao, D., & Fu, K. (2015). Enhancing the CH<sub>4</sub> yield of anaerobic digestion via endogenous CO<sub>2</sub> fixation by exogenous H<sub>2</sub>. *Chemosphere*, 140, 34-39.  
<https://doi.org/https://doi.org/10.1016/j.chemosphere.2014.10.022>
- Lü, Y., Li, J., Li, Y., Liang, L., Dong, H., Chen, K., Yao, C., Li, Z., Li, J., & Guan, X. (2019). The roles of pyrite for enhancing reductive removal of nitrobenzene by zero-valent iron. *Applied Catalysis B: Environmental*, 242, 9-18. <https://doi.org/https://doi.org/10.1016/j.apcatb.2018.09.086>
- Mossmann, A., Dotto, G. L., Hotza, D., Jahn, S. L., & Foletto, E. L. (2019). Preparation of polyethylene-supported zero-valent iron buoyant catalyst and its performance for Ponceau 4R decolorization by photo-Fenton process. *Journal of Environmental Chemical Engineering*, 7(2), 102963.  
<https://doi.org/https://doi.org/10.1016/j.jece.2019.102963>
- Shao, Y., Zhao, P., Yue, Q., Wu, Y., Gao, B., & Kong, W. (2018). Preparation of wheat straw-supported Nanoscale Zero-Valent Iron and its removal performance on ciprofloxacin. *Ecotoxicology and Environmental Safety*, 158, 100-107. <https://doi.org/https://doi.org/10.1016/j.ecoenv.2018.04.020>
- Su, L., Shi, X., Guo, G., Zhao, A., & Zhao, Y. (2013). Stabilization of sewage sludge in the presence of nanoscale zero-valent iron (nZVI): abatement of odor and improvement of biogas production. *Journal of Material Cycles and Waste Management*, 15(4), 461-468.  
<https://doi.org/10.1007/s10163-013-0150-9>
- Sukwanitch, K. (2011). Comparison of biogas production improvement from cassava pulp between acid and alkaline hydrolysis processes. *Master of Science Thesis in Environmental Engineering, Graduate School, Chiang Mai University*.
- Yang, Y., Yang, F., Huang, W., Huang, W., Li, F., Lei, Z., & Zhang, Z. (2018). Enhanced anaerobic digestion of ammonia-rich swine manure by zero-valent iron: With special focus on the enhancement effect on hydrogenotrophic methanogenesis activity. *Bioresource Technology*, 270, 172-179. <https://doi.org/https://doi.org/10.1016/j.biortech.2018.09.008>
- Yangin-Gomec, C., Olmez-Hanci, T., Arslan-Alaton, I., Khoei, S., & Fakhri, H. (2018). Iopamidol degradation with ZVI- and ZVA-activated chemical oxidation: Investigation of toxicity, anaerobic inhibition and microbial communities. *Journal of Environmental Chemical Engineering*, 6(6), 7318-7326. <https://doi.org/https://doi.org/10.1016/j.jece.2018.09.028>
- Zhang, Y., An, X., & Quan, X. (201). Enhancement of sludge granulation in a zero valence iron packed anaerobic reactor with a hydraulic circulation. *Process Biochemistry*, 46(2), 471-476.  
<https://doi.org/https://doi.org/10.1016/j.procbio.2010.09.021>
